# Supplementary material
Source: ML conference proceedings conference paper supplement (https://openaccess.thecvf.com/content/CVPR2023/html/Zhang_CompletionFormer_Depth_Completion_CVPR_2023_paper.html)
Supplement: Supplementary file 1 [file Zhang_CompletionFormer_Depth_Completion_CVPR_2023_supplemental.pdf]

# CompletionFormer: Depth Completion with Convolutions and Vision Transformers

Youmin Zhang<sup>1</sup>      Xianda Guo<sup>2</sup>      Matteo Poggi<sup>1</sup>  
 Zheng Zhu<sup>2</sup>      Guan Huang<sup>2</sup>      Stefano Mattoccia<sup>1</sup>

<sup>1</sup> University of Bologna    <sup>2</sup> PhiGent Robotics

<sup>1</sup>{youmin.zhang2, m.poggi, stefano.mattoccia}@unibo.it

## A. Appendix

### A.1. Qualitative Results on NYUv2 Dataset

Qualitative results concerning the NYUv2 dataset [3] are provided in Fig. 1. In both visualized cases, we can notice the improved results yielded by our CompletionFormer compared to NLSPN [2]. Especially for the transparent regions near the windows in both cases, with local details of convolution and global cues of Transformer, our complete model (Ours) predicts clear object boundaries while NLSPN and Ours-ViT give blurry estimations.

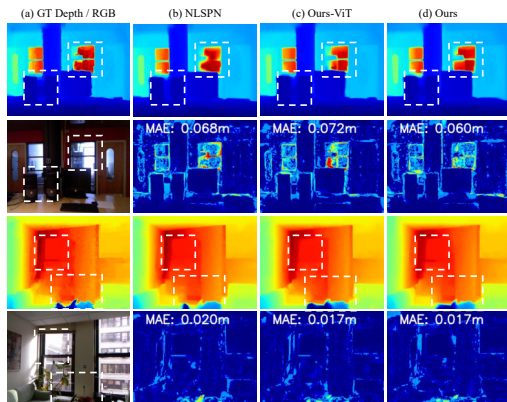

Figure 1. **Qualitative results on NYUv2 dataset.** Comparisons of our method against state-of-the-art method, *i.e.* NLSPN [2] are presented. We provide RGB images, and dense predictions. The colder the colors of the error map, the lower the errors. Ours-ViT denotes that only the Transformer layer is enabled in our proposed block.

### A.2. Model Architecture Details

To better understand our architecture and to ease reproducibility, we present the network parameters of our CompletionFormer in Tab. 1.

| Name                                                                            | Layer setting                                                                                         | Output dimension                                                                    |
|---------------------------------------------------------------------------------|-------------------------------------------------------------------------------------------------------|-------------------------------------------------------------------------------------|
| <b>RGB and Depth Embedding</b>                                                  |                                                                                                       |                                                                                     |
| input                                                                           |                                                                                                       | RGB Image: $H \times W \times 3$<br>Sparse Depth: $H \times W \times 1$             |
| conv_separate                                                                   | Conv $3 \times 3, 48$ for RGB Image<br>Conv $3 \times 3, 16$ for Sparse Depth                         | RGB Feature: $H \times W \times 48$<br>Sparse Depth Feature: $H \times W \times 16$ |
| conv1                                                                           | concat [RGB, Sparse Depth Feature]<br>Conv $3 \times 3, 64$                                           | $H \times W \times 64$                                                              |
| <b>Joint Convolutional Attention and Transformer Encoder</b>                    |                                                                                                       |                                                                                     |
| conv2                                                                           | ResNet34 [1] BasicBlock $\times 3$                                                                    | $H \times W \times 64$                                                              |
| conv3                                                                           | ResNet34 [1] BasicBlock $\times 4$                                                                    | $\frac{1}{2}H \times \frac{1}{2}W \times 128$                                       |
| conv4                                                                           | Joint Convolutional Attention and Transformer Block $\times 3$                                        | $\frac{1}{4}H \times \frac{1}{4}W \times 64$                                        |
| conv5                                                                           | Joint Convolutional Attention and Transformer Block $\times 3$                                        | $\frac{1}{4}H \times \frac{1}{4}W \times 128$                                       |
| conv6                                                                           | Joint Convolutional Attention and Transformer Block $\times 6$                                        | $\frac{1}{16}H \times \frac{1}{16}W \times 320$                                     |
| conv7                                                                           | Joint Convolutional Attention and Transformer Block $\times 3$                                        | $\frac{1}{32}H \times \frac{1}{32}W \times 512$                                     |
| <b>Decoder</b>                                                                  |                                                                                                       |                                                                                     |
| dec6                                                                            | ConvTranspose $3 \times 3$ , stride = 2, 256<br>Convolutional Attention Layer                         | $\frac{1}{16}H \times \frac{1}{16}W \times 256$                                     |
| dec5                                                                            | concat [dec6, conv6]<br>ConvTranspose $3 \times 3$ , stride = 2, 128<br>Convolutional Attention Layer | $\frac{1}{8}H \times \frac{1}{8}W \times 128$                                       |
| dec4                                                                            | concat [dec5, conv5]<br>ConvTranspose $3 \times 3$ , stride = 2, 64<br>Convolutional Attention Layer  | $\frac{1}{4}H \times \frac{1}{4}W \times 64$                                        |
| dec3                                                                            | concat [dec4, conv4]<br>ConvTranspose $3 \times 3$ , stride = 2, 64<br>Convolutional Attention Layer  | $\frac{1}{2}H \times \frac{1}{2}W \times 64$                                        |
| dec2                                                                            | concat [dec3, conv3]<br>ConvTranspose $3 \times 3$ , stride = 2, 64<br>Convolutional Attention Layer  | $H \times W \times 64$                                                              |
| <b>Initial Depth, Confidence, Non-local Neighbors, Affinity Prediction Head</b> |                                                                                                       |                                                                                     |
| dec1                                                                            | concat [dec2, conv2]<br>Conv $3 \times 3, 64$                                                         | $H \times W \times 64$                                                              |
| dec0                                                                            | concat [dec1, conv1]<br>Conv $3 \times 3, \eta$                                                       | $H \times W \times \eta$                                                            |
| <b>SPN Refinement</b>                                                           |                                                                                                       |                                                                                     |
| refine                                                                          | Spatial Propagation Network [2] with recurrent time $K = 6$                                           | $H \times W \times 1$                                                               |

Table 1. Network parameters of CompletionFormer. ‘concat’ means performing concatenate operation at Channel dimension. For each prediction head, it takes almost the same design, and only the output channel  $\eta$  is dependent on the output type, *e.g.*  $\eta = 1$  for initial depth prediction.

## References

- [1] Kaiming He, Xiangyu Zhang, Shaoqing Ren, and Jian Sun. Identity mappings in deep residual networks. In *ECCV*, pages 630–645. Springer, 2016.
- [2] Jinsun Park, Kyungdon Joo, Zhe Hu, Chi-Kuei Liu, and In So Kweon. Non-local spatial propagation network for depth completion. In *ECCV*, pages 120–136. Springer, 2020.
- [3] Nathan Silberman, Derek Hoiem, Pushmeet Kohli, and Rob Fergus. Indoor segmentation and support inference from rgb-d images. In *ECCV*, pages 746–760. Springer, 2012.
